# Supplementary material
Source: HighWire-hosted journal article supplement (https://jnm.snmjournals.org/highwire/filestream/95209/field_highwire_adjunct_files/0/187807_Supplemental_Data.pdf)
Supplement: 187807_Supplemental_Data.pdf [file 187807_Supplemental_Data.pdf]

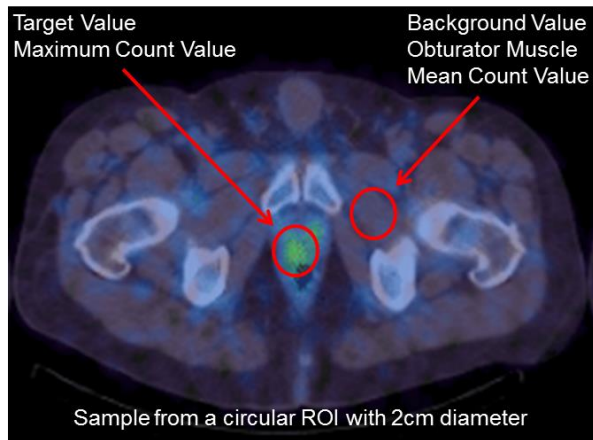

Supplemental Figure 1. Transverse slice of  $^{99m}\text{Tc}$ -trofolastat SPECT/CT at the level of the prostate gland with representative circular ROIs over the lesion and within the obturator muscle.

Supplemental Table 1. Visual scoring scale

| <b>Score</b> | <b>Description</b>                                            | <b>TBR</b>           |
|--------------|---------------------------------------------------------------|----------------------|
| 0            | Equal to Background Activity/ No Contrast/No Lesions Observed | $\leq 6$             |
| 1            | Slightly Above Background/Poor Contrast                       | $> 6$ and $\leq 8$   |
| 2            | Above Background/Good Contrast                                | $> 8$ and $\leq 10$  |
| 3            | Above Background/Excellent Contrast                           | $> 10$ and $\leq 15$ |
| 4            | Greater than all other activity/Excellent Contrast            | $> 15$               |

TBR tumor-to-background ratio

Supplemental Table 2. Categorical mean uptake and visual scores

|                          | N   | TBR  |      | Visual scores  |                 |                 |                 |
|--------------------------|-----|------|------|----------------|-----------------|-----------------|-----------------|
|                          |     | Mean | SD   | Overall Median | Reader 1 Median | Reader 2 Median | Reader 3 Median |
| SPECT scans*             | 103 |      |      |                |                 |                 |                 |
| Treated                  | 26  | 16.2 | 11.2 | 3.0            | 2.0             | 3.0             | 4.0             |
| Untreated                | 77  | 37.7 | 35.6 | 4.0            | 3.0             | 4.0             | 4.0             |
| Prostate Lobes*          | 206 |      |      |                |                 |                 |                 |
| Treated                  | 56  | 15.4 | 11.4 | 2.0            | 0.0             | 1.0             | 3.0             |
| Untreated                | 150 | 28.1 | 30.6 | 3.0            | 2.0             | 1.0             | 4.0             |
| Normal Lobes             | 24  | 13.5 | 15.2 | 0.0            | 0.0             | 0.0             | 2.5             |
| Abnormal Lobes†          | 182 | 26.1 | 28.2 | 3.0            | 2.0             | 2.0             | 4.0             |
| GS 6                     | 12  | 12.3 | 8.3  | 0.5            | 0.0             | 0.5             | 3.0             |
| GS 7                     | 71  | 22.0 | 25.6 | 3.0            | 2.0             | 1.0             | 4.0             |
| GS 8-10                  | 60  | 41.3 | 34.6 | 4.0            | 3.0             | 4.0             | 4.0             |
| GS ≤3+3                  | 36  | 13.1 | 13.2 | 1.0            | 0.0             | 0.0             | 3.0             |
| GS ≥3+4                  | 131 | 30.8 | 31.4 | 4.0            | 3.0             | 3.0             | 4.0             |
| Lymph node involvement†† |     |      |      |                |                 |                 |                 |
| Yes                      | 33  | 40.9 | 36.1 | 4.0            | 3.0             | 4.0             | 4.0             |
| No                       | 69  | 28.5 | 30.5 | 3.0            | 3.0             | 3.0             | 4.0             |

\* 2 Patients had non-evaluable or missing SPECT/CT scans and/or pathology results (600-001, 801-001)

† 39 Prostate lobes were unevaluable for Gleason grade but noted as having histopathology consistent with PCa

†† 3 Patients had non-evaluable or missing lymph node pathology and/or missing or unevaluable SPECT/CT scans (101-002, 105-002, 600-001)

TBR target-to-background ratio, SD standard deviation, GS Gleason score

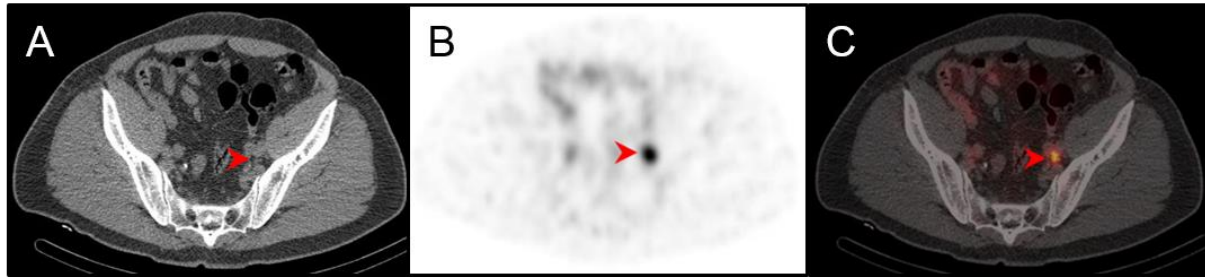

Supplemental Figure 2. Example of fused axial  $^{99m}\text{Tc}$ -trofolostat SPECT/CT (C) with corresponding CT (A) and SPECT (B) slices showing a positive small lymph node in the left obturator fossa. Red arrow heads indicate location of histologically confirmed metastatic lymph node.
